# Supplementary material for: Prediction of pH in multiphase multicomponent systems with ePC-SAFT advanced
Source: Royal Society of Chemistry journal article supplement (doi:10.1039/d2cc02943j), 2022-01-01
Supplement: d2cc02943j1.pdf [file d2cc02943j1.pdf]

## Supporting Information

# Prediction of pH in multiphase multicomponent systems with ePC-SAFT advanced: Theory and Examples

*Moreno Ascani, Daniel Pabsch, Marcel Klinksiek, Nicolás Gajardo-Parra, Gabriele Sadowski  
and Christoph Held\**

*Laboratory of Thermodynamics, Department of Biochemical and Chemical Engineering, TU  
Dortmund University, Emil-Figge-Str. 70, 44227 Dortmund, Germany.*

*E-mail: christoph.held@tu-dortmund.de*

## A. THERMODYNAMICS FUNDAMENTALS

### *Equilibrium Constant*

Modeling of reaction equilibria requires the activity-based equilibrium constant  $K_a$ .

$$K_a(T, p) = K_x(T, p, x) \cdot K_\gamma(T, p, x) \prod_i (x_i \cdot \gamma_i)^{v_i} \quad (1)$$

For each reaction, the equilibrium constant can be expressed by the component's mole fractions  $x_i$ , thermodynamic activity coefficients  $\gamma_i$ , and stoichiometric coefficients  $v_i$  (Eq. (1)). For the pH prediction, it is necessary to calculate the amount of  $H^+$  in the mixture.  $K_x$  defines the mole-fraction based equilibrium constant and  $K_\gamma$  the activity coefficient based constant.  $K_a$  is independent of the composition in the liquid phase and only depends on temperature and pressure. The reactions considered in this work, for the system water-CO<sub>2</sub>, are given as follows:

| <b>Involved reactions:</b>                                        | <b>System:</b>                |
|-------------------------------------------------------------------|-------------------------------|
| $H_2O \rightleftharpoons OH^- + H^+$                              |                               |
| $H_2O + CO_2 \rightleftharpoons HCO_3^- + H^+$                    | Water-CO <sub>2</sub> (+salt) |
| $HCO_3^- \rightleftharpoons CO_3^{2-} + H^+$                      |                               |
| $H_2O \rightleftharpoons OH^- + H^+$                              |                               |
| $HAc \rightleftharpoons Ac^- + H^+$                               | Water – solvent -acetic acid  |
| $H_2O \rightleftharpoons OH^- + H^+$                              |                               |
| $HOx \rightleftharpoons Ox^- + H^+ \quad (first\ dissociation)$   | Water – solvent - oxalic acid |
| $H_2O \rightleftharpoons OH^- + H^+$                              |                               |
| $HCit \rightleftharpoons Cit^- + H^+ \quad (first\ dissociation)$ | Water – solvent - citric acid |

The activity coefficients  $\gamma_i$  were calculated via fugacity coefficients  $\varphi_i$  referred to the fugacity coefficient of the pure component  $\varphi_{0i}$  or referred to as an infinite diluted state  $\varphi_i^\infty$  according to Eq. (2-4).

$$\gamma_i^0 = \frac{\varphi_i(T, p, x)}{\varphi_{0i}(T, p, x_i = 1)} \quad (2)$$

$$\gamma_i^{*,x} = \frac{\varphi_i(T, p, x)}{\varphi_i^\infty(T, p, x_i = 0)} \quad (3)$$

$$\gamma_i^{*,\tilde{m}} = \frac{\varphi_i(T, p, x)}{\varphi_i^\infty(T, p, x_i = 0)} x_w = \gamma_i^{*,x} x_w \quad (4)$$

The molality-based rational activity coefficient  $\gamma_i^{*,\tilde{m}}$  (Eq. (4)) is a very important quantity in electrolyte - and biothermodynamics and is used throughout this work to describe the non-ideality of all the dissolved species taking part in the reaction (Eq. (1)), except for water, for which the symmetric activity coefficient (Eq. (2)) is used. ePC-SAFT advanced is used in this work to describe the electrolyte system and calculate the fugacity coefficients.

### ***Phase-equilibria calculations***

In this work, a reactive flash calculation is employed to determine the species distribution and the pH of the aqueous phase in the investigated systems. At given conditions  $T$  and  $p$ , for an unimolar feed ( $\sum_{i=1}^N N_i = \sum_{i=1}^N z_i = 1$ ) with composition  $z$  and a given, the goal is to find the number of phases  $\pi$  and composition set  $\bar{x} = (\bar{x}^{(1)}, \dots, \bar{x}^{(\pi)})$  that minimizes the free energy  $G$  of the system. The number of stable phases at equilibrium and an estimation of their composition are determined by applying the tangent plane criterion of Michelsen<sup>1,2</sup> on the chemically equilibrated feed; however, no more than two phases were detected on the investigated systems, neither experimentally nor during modeling. After applying the tangent plane criterion, the obtained aqueous phase is further chemically equilibrated to improve the quality of the initial composition for the subsequent phase equilibrium calculation. The phase equilibrium calculation is accomplished by solving the system of equations given by Eq. (5) - (8).

$$1 - \frac{x_i^{(1)}}{x_i^{(2)}} \exp(\ln \varphi_i^{(1)} - \ln \varphi_i^{(2)}) = 0 \quad i \in \{1, \dots, N^{neu}\} \quad (5)$$

$$1 - \frac{x_{\pm,ij}^{(1)}}{x_{\pm,ij}^{(2)}} \exp(\ln \varphi_{\pm,ij}^{(1)} - \ln \varphi_{\pm,ij}^{(2)}) = 0 \quad i = cat, j = an \quad (6)$$

$$\left( N_i + \sum_{k=i}^{N^{reac}} \nu_{i,k} \lambda_k \right) - \sum_{j=1}^{\pi} n_i^{(j)} = 0 \quad i = 1, \dots, N^{neu}, i = 1, \dots, N^{ch} - 1 \quad (7)$$

$$K_k - K_{x,k}^{(s)} K_{\gamma,k}^{(s)} = 0 \quad k = 1, \dots, N^{reac} \quad (8)$$

In Eq. (5) - (8),  $N^{neu}$  denotes the number of neutral components,  $N^{ch}$  the number of charged components and  $N^{reac}$  the number of considered chemical reactions.  $\lambda_k$  is the reaction coordinate of the k-er chemical reaction and  $\nu_{i,k}$  denotes the stoichiometric coefficient of component i in reaction j. The superscript (s) in Eq. (8) indicates a reference phase in which the equilibrium condition is imposed. In this work, the aqueous phase is always chosen to be the reference phase (It should be noticed that once Eq. (8) is fulfilled in one phase, due to equation (5) and (6) it is automatically fulfilled in all the other phases in which reactant and products of the reaction k are present). Furthermore, the presence of electrolytes is neglected in the vapor as well as in the organic phase because it is negligible in the investigated system. Therefore, the electrolytes are forced to remain in the aqueous phase, and Eq. (6) is neglected. The given system of equations is solved in an *inner loop* with a constant value of the fugacity coefficients  $\ln \varphi_i^{(j)}$ . The value of the fugacity coefficients is updated in an *outer loop*, and the system of equations is solved again until the change of the obtained solution after updating the fugacity coefficients is negligible.

### *ePC-SAFT advanced*

Starting with the SAFT-based models developed by Chapman in 1989<sup>3</sup>, significant progress in developing the equation of state based on perturbation theories was achieved. Gross and Sadowski first published PC-SAFT in 2001<sup>4</sup>, which accounts for the perturbation of a hard chain instead of a hard-sphere. This framework was further developed in 2005 by Cameretti and Sadowski<sup>5</sup> to the electrolyte Perturbed-Chain Statistical Associating Fluid Theory (ePC-SAFT). ePC-SAFT includes electrostatic interionic interaction and, nowadays, a concentration-dependent dielectric constant<sup>6</sup>. Lately, the model was expanded with an altered Born term to include electrostatic interactions between charged components and their surrounding medium<sup>7</sup>. This enables the modeling of aqueous electrolyte solutions containing salts. The resulting ‘ePC-SAFT advanced’ model expresses the residual Helmholtz energy  $a^{res}$  is shown in Eq. (9).

$$a^{res} = a^{hc} + a^{disp} + a^{assoc} + a^{DH} + a^{born} \quad (9)$$

Here,  $a^{hc}$  is the respective energy contribution of the hard chain,  $a^{disp}$  and  $a^{assoc}$  describe the perturbations resulting from dispersive van der Waal attractions and hydrogen bonding. The analytical expressions of these three contributions are given in the original PC-SAFT publication<sup>4</sup>. In the presence of a charged species, the Debye-Hückel (DH) term  $a^{ion}$  is introduced to account Coulomb interactions. According to the theory of Debye and Hückel<sup>8</sup> ions are treated as spheres of a fixed diameter with a point charge in their center, immersed in a solvent considered<sup>9</sup> as a dielectric continuum of dielectric constant  $\varepsilon = \varepsilon_0 \varepsilon_r$ . The Debye-Hückel term is given in Eq. (10)

$$a^{ion} = -\frac{\kappa}{12\pi \cdot \varepsilon} \sum_j \chi_j q_j^2 x_j \quad (10)$$

Expression for the screening length ( $\kappa$ ) and the “chi”-parameter ( $\chi_j$ ) are given elsewhere<sup>5</sup>. The Born contribution to the residual Helmholtz energy  $a^{Born}$  account the electrostatic interaction between ions and the surrounding solvent solvation model and is expressed by Eq. (10)<sup>7</sup>.

$$a^{Born} = -\frac{e^2}{4\pi\varepsilon_0 k_B T} \left(1 - \frac{1}{\varepsilon_r}\right) \sum_r \frac{z_i^2 x_i}{a_i} \quad (11)$$

In Eq. (11)  $e$  describe the elementary charge and the Born radii  $a_i$  were set to the respective diameters of the ions estimated within the original ePC-SAFT. Further information about the DH

and Born term is given in the literature <sup>7</sup>. “ePC-SAFT advanced” requires five pure-component parameters for each associating component  $i$ . These parameters are the segment number  $m_i^{seg}$ , segment diameter  $\sigma_i$ , the dispersion-energy parameter  $u_i/k_B$ , the association-energy parameter  $\varepsilon^{AiBi}$  and association-volume parameter  $\kappa^{AiBi}$ . For associating components an association scheme needs to be defined. For water the 2B model was used<sup>10</sup>.

Additionally, one binary interaction parameter  $k_{ij}$  between two components,  $i$  and  $j$ , as well as the dielectric constant of the pure component, is required. For the calculation of mixture properties combining rules of Berthelot-Lorenz are applied Eq. (12) and (13):

$$\sigma_{ij} = \frac{1}{2}(\sigma_i + \sigma_j) \quad (12)$$

$$u_{ij} = \sqrt{u_i u_j}(1 - k_{ij}) \quad (13)$$

ePC-SAFT advanced modeling results were compared to experimental data. For that purpose, the average absolute relative deviation (*AARD*) related to the mean value of experimental solubility data (Eq. 14)) was used.

$$ARD(\%) = 100 \times \frac{N_{exp} - N_{PC-SAFT}}{N_{exp}} \quad (14)$$

Where  $N_{exp}$  denotes literature data and  $N_{PC-SAFT}$  represents the results from ePC-SAFT advanced. The calculated ARD values for the investigated systems are listed and evaluated in Table S6.

## B. SUPPORTING FIGURES

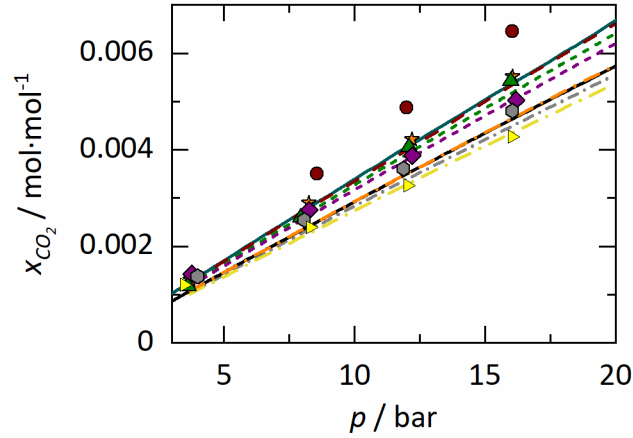

**Figure S1:** Vapor liquid equilibrium from the systems water + CO<sub>2</sub> + NaHCO<sub>3</sub>. T= 313 K and  $\tilde{m} = 0.1$  mol/kg, (circles), T= 313 K and  $\tilde{m} = 0.5$  mol/kg, (stars), T= 323 K and  $\tilde{m} = 0.1$  mol/kg (triangles), T= 313 K and  $\tilde{m} = 1$  mol/kg (diamond), T= 323 K and  $\tilde{m} = 0.5$  mol/kg (hexagon) and T= 323 K and  $\tilde{m} = 1$  mol/kg (right-point triangle). Dashed lines represent ePC-SAFT, and continuous line represents ePC-SAFT using parameters from Table S1, S2 and S3.

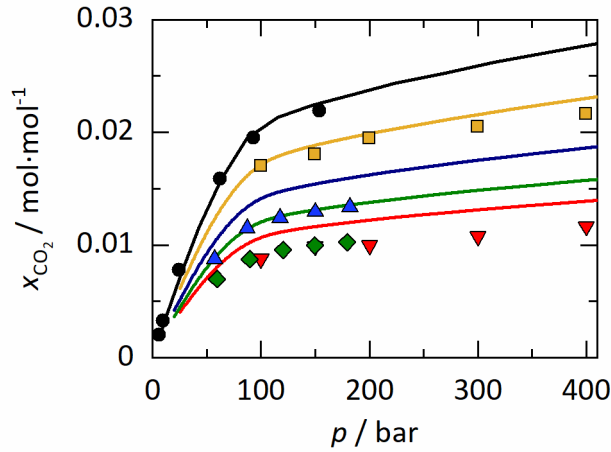

**Figure S2:** CO<sub>2</sub> mole fraction solubility as a function of pressure at T = 323 K for different NaCl molalities (circles salt free from Peng et al.<sup>11</sup> squares  $\tilde{m} = 1$  mol/kg, and down-triangles  $\tilde{m} = 5$  mol/kg from Yan et al.<sup>12</sup>, up-triangles  $\tilde{m} = 2.5$  mol/kg and diamonds  $\tilde{m} = 4$  mol/kg from Hou et al.<sup>13</sup>). Lines are ePC-SAFT modeling results using parameters from Tables S1-S3.

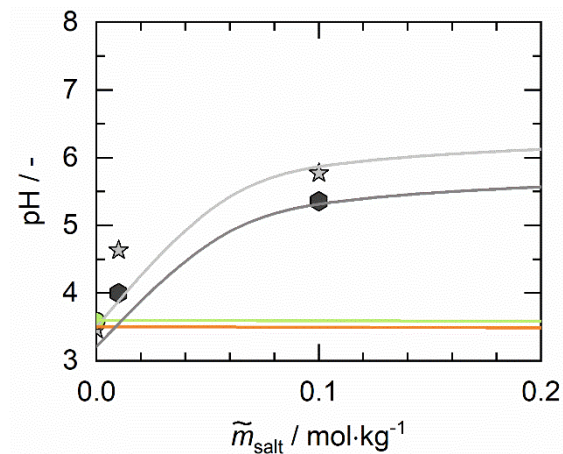

**Figure S3:**  $pH$  of the ternary system  $\text{CO}_2 + \text{water} + \text{salt}$  as a function of salt molality  $\tilde{m}_{\text{salt}}$  at equilibrium  $\text{CO}_2$  concentrations. Symbols are experimental data from the literature (stars<sup>11</sup>:  $\text{NaHCO}_3$  at  $T = 308 \text{ K}$  and  $p = 9.2 \text{ bar}$ , hexagons<sup>11</sup>:  $\text{NaHCO}_3$  at  $T = 308 \text{ K}$  and  $p = 43 \text{ bar}$ , circles<sup>11</sup>:  $\text{NaCl}$   $T = 343 \text{ K}$  and  $p = 10 \text{ bar}$ , and triangles<sup>14</sup>:  $\text{KCl}$  at  $T = 298 \text{ K}$  and  $p = 9 \text{ bar}$ ). Lines are ePC-SAFT modeling results using parameters from Tables S1-S3.

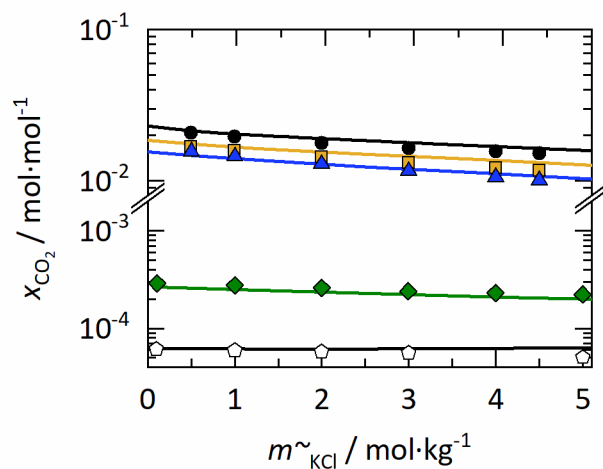

**Figure S4:**  $\text{CO}_2$  mole fraction solubility as a function of  $\text{KCl}$  molality at different pressures (150 bar from Zhao et al.<sup>15</sup>: circles  $T = 323 \text{ K}$ , squares  $T = 373 \text{ K}$ , and up-triangles  $T = 423 \text{ K}$ ; 1 bar from He et al.<sup>16</sup>: diamond  $T = 323 \text{ K}$  and pentagons  $T = 363 \text{ K}$ ). Lines: ePC-SAFT modeling results using parameters from Tables S1-S3.



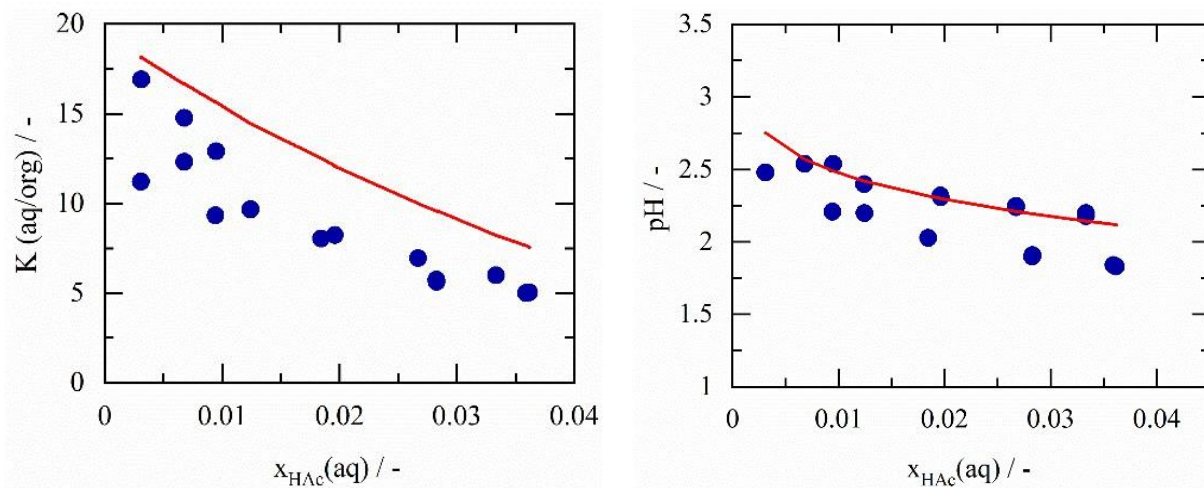

**Figure S5:** Partition coefficient of acetic acid in the mixture of water and toluene. Blue circles represent experimental literature data from Kirsch et al.<sup>17</sup> compared to modeling results obtained with the ePC-SAFT (red line) using parameters from Table S1, S2 and S3.

## C. SUPPORTING TABLES

**Table 1:** Pure-component parameters of water and the organic solvents used in this work.

| Solvent         | $m_i^{seg}$ | $\sigma_i$<br>/ Å | $u_i/k_B$<br>/ K | N:N | $\epsilon^{AiBi}$<br>/ K | $\kappa^{AiBi}$ | Ref. |
|-----------------|-------------|-------------------|------------------|-----|--------------------------|-----------------|------|
| Water           | 1.2047      | 2.7927            | 353.95           | 1:1 | 2425.7                   | 0.04510         | 18   |
| CO <sub>2</sub> | 2.0729      | 2.7852            | 169.21           | 1:1 | 0                        | 0.04510         | 19   |
| MIBK            | 3.6799      | 3.3628            | 259.89           | 1:1 | -                        | 0.04510         | 20   |
| Toluene         | 2.8149      | 3.7169            | 285.69           | -   | -                        | -               | 4    |
| Acetic Acid     | 1.3403      | 3.8582            | 211.59           | 1:1 | 3044.4                   | 0.07555         | 21   |
| Oxalic acid     | 3.3585      | 2.7486            | 180.14           | 1:1 | 1654.78                  | 0.02000         | 22   |
| Citric acid     | 8.546       | 2.723             | 227.18           | 4:4 | 2488                     | 0.044           | 23   |

**Table 2:** ePC-SAFT pure-component parameters.<sup>24</sup> Segment number is unity for all ions. For the oxalate anion, the same pure-component parameters as for oxalic acid were used and a negative charged segment was added. Binary interaction parameters  $k_{ij}$  between water and ions were all set to zero.

| Ion                           | $\sigma_i$ / Å | $u_i/k_B$ / K |
|-------------------------------|----------------|---------------|
| Na <sup>+</sup>               | 2.8232         | 230.00        |
| K <sup>+</sup>                | 3.3417         | 200.00        |
| Cl <sup>-</sup>               | 2.7560         | 170.00        |
| HCO <sub>3</sub> <sup>-</sup> | 2.9296         | 70.00         |
| CO <sub>3</sub> <sup>2-</sup> | 2.4422         | 249.26        |
| H <sup>+</sup>                | 3.4656         | 500.00        |
| OH <sup>-</sup>               | 2.0177         | 650.00        |
| Ac <sup>-</sup>               | 3.9328         | 150.00        |
| Ci <sup>-</sup>               | 4.4600         | 250.00        |

**Table 3:** Binary interaction parameters used in this work.

| Binary systems                                  | $k_{ij,a}$ | $k_{ij,T}$ | Ref.      |
|-------------------------------------------------|------------|------------|-----------|
| Water-CO <sub>2</sub>                           | 0.0122     | 0.0003016  | 19        |
| Na <sup>+</sup> - HCO <sub>3</sub> <sup>-</sup> | -0.51400   | -          | 24        |
| K <sup>+</sup> - Cl <sup>-</sup>                | 0.064      | -          | 24        |
| Na <sup>+</sup> - Cl <sup>-</sup>               | 0.317      | -          | 24        |
| H <sup>+</sup> - Cl <sup>-</sup>                | 0.654      | -          | 24        |
| Na <sup>+</sup> - OH <sup>-</sup>               | 0.649      | -          | 24        |
| K <sup>+</sup> - OH <sup>-</sup>                | 1.000      | -          | 24        |
| Water - Toluene                                 | 0.02100    | 0.000726   | 24        |
| Water - Acetic acid                             | -0.12470   | -          | 25        |
| Water - MIBK                                    | -0.0550    | -          | 26        |
| Water – Oxalic acid                             | -0.02560   | -          | 22        |
| Water – Citric acid                             | -0.11000   | -          | 27        |
| Toluene – Acetic acid                           | -0.08317   | -          | This work |
| MIBK – Oxalic acid                              | 0.16300    | -          | This work |
| MIBK – Citric acid                              | -0.25000   | -          | This work |

**Table 4:** pK<sub>a</sub> values of the acids used in this work. Temperature- and pressure-dependent correlations, whenever used, are denoted in the table by a “f(T,p)” and can be found in the respective references.

| Acid                      | $pK_a$ | Ref.  |
|---------------------------|--------|-------|
| Acetic acid               | 4.76   | 28    |
| Oxalic acid               | 1.23   | 29    |
| Citric Acid               | 3.13   | 28    |
| Water<br>(autoprotolysis) | f(T,p) | 30,31 |
| CO <sub>2</sub>           | f(T,p) | 30,31 |

**Table 5:** Dielectric constants for solvents and salts applied in this work. All salts are modeled with a similar dielectric constant that is a mean of available experimental data.

| Component | Dielectric constant / $C \cdot Vm^{-1}$ | Ref. |
|-----------|-----------------------------------------|------|
| Water     | $-105.2 \ln T + 677.480$                | 32   |
| Salts     | 8                                       | a)   |

a) All salts were modeled with the same dielectric constant as the mean of available experimental data.<sup>33</sup>

**Table 6:** Compared literature data for the investigated system and the corresponding AARD.

| System                                       | Data points | <i>T and p range</i>        | AARD % |
|----------------------------------------------|-------------|-----------------------------|--------|
| CO <sub>2</sub> / Water                      | 37          | 308 – 413 K<br>20 – 153 bar | 1.339  |
| CO <sub>2</sub> / Water / NaHCO <sub>3</sub> | 29          | 308 – 353 K<br>10 – 153 bar | 5.187  |
| CO <sub>2</sub> / Water / NaCl               | 3           | 343 K<br>10 bar             | 1.952  |
| CO <sub>2</sub> / Water / KCl                | 2           | 298 K<br>9 bar              | 0.833  |
| Toluene / Water / Acetic Acid                | 19          | 298 K<br>1 bar              | 6.902  |
| MIBK / Water / Oxalic Acid                   | 19          | 298 K<br>1 bar              | 9.690  |
| MIBK / Water / Citric Acid                   | 9           | 298 K<br>1 bar              | 43.436 |

**Table 7:** Literature data and modeling results obtained with ePC-SAFT advanced for the binary system CO<sub>2</sub> + water.

\*Literature data taken from Peng et al.<sup>34</sup>.

| <i>T / K</i> | <i>p / bar</i> | <i>pH<sup>exp,*</sup> / -</i> | <i>pH<sup>Modeled</sup> / -</i> | <i>ARD / %</i> |
|--------------|----------------|-------------------------------|---------------------------------|----------------|
| 308.3        | 3.8            | 3.71                          | 3.701                           | 0.243          |
|              | 6.1            | 3.58                          | 3.613                           | 0.922          |
|              | 9.7            | 3.46                          | 3.525                           | 1.879          |
|              | 24.3           | 3.22                          | 3.314                           | 2.919          |

|       |       |      |       |       |
|-------|-------|------|-------|-------|
|       | 62.3  | 3.05 | 3.143 | 3.049 |
|       | 92.8  | 3.01 | 3.102 | 3.056 |
|       | 153.8 | 2.97 | 3.072 | 3.434 |
| 323   | 3.8   | 3.76 | 3.737 | 0.612 |
|       | 6.1   | 3.63 | 3.647 | 0.468 |
|       | 9.8   | 3.52 | 3.536 | 0.455 |
|       | 24.3  | 3.36 | 3.347 | 0.387 |
|       | 62.3  | 3.14 | 3.173 | 1.051 |
|       | 92.8  | 3.07 | 3.112 | 1.368 |
|       | 153.6 | 3.04 | 3.070 | 0.987 |
| 343   | 3.8   | 3.89 | 3.81  | 2.057 |
|       | 6.1   | 3.72 | 3.71  | 0.269 |
|       | 9.9   | 3.59 | 3.60  | 0.279 |
|       | 24.3  | 3.42 | 3.41  | 0.292 |
|       | 62.2  | 3.25 | 3.23  | 0.615 |
|       | 92.8  | 3.18 | 3.16  | 0.629 |
|       | 153.9 | 3.12 | 3.09  | 0.962 |
| 368.1 | 6     | 3.97 | 3.827 | 3.602 |
|       | 10    | 3.77 | 3.704 | 1.751 |
|       | 24.2  | 3.56 | 3.502 | 1.629 |
|       | 63.6  | 3.35 | 3.316 | 1.015 |
|       | 93    | 3.28 | 3.240 | 1.220 |
|       | 154.1 | 3.23 | 3.154 | 2.353 |
| 398.3 | 10    | 3.97 | 3.875 | 2.393 |
|       | 24.4  | 3.63 | 3.647 | 0.468 |
|       | 62.9  | 3.47 | 3.447 | 0.663 |
|       | 93.6  | 3.34 | 3.364 | 0.719 |
|       | 153.6 | 3.32 | 3.269 | 1.536 |
| 423.2 | 10    | 4.11 | 4.083 | 0.657 |
|       | 24.4  | 3.78 | 3.794 | 0.370 |
|       | 62.9  | 3.59 | 3.574 | 0.446 |

|       |      |       |       |
|-------|------|-------|-------|
| 93.6  | 3.54 | 3.484 | 1.582 |
| 153.7 | 3.49 | 3.378 | 3.209 |

**Table 8:** Literature data and modeling results obtained with ePC-SAFT advanced for the system CO<sub>2</sub> + water + NaHCO<sub>3</sub>. \*Literature data taken from Li et al.<sup>11</sup> and Han et al.<sup>35</sup>.

| $T / \text{K}$ | $p / \text{bar}$ | $\tilde{m}_{\text{salt}} / \text{mol} \cdot \text{kg}^{-1}$ | $\text{pH}^{\text{exp},*} / -$ | $\text{pH}^{\text{Modeled}} / -$ | $\text{ARD} / \%$ |       |
|----------------|------------------|-------------------------------------------------------------|--------------------------------|----------------------------------|-------------------|-------|
| 308.3          | 10               | 0                                                           | 3.46                           | 3.5                              | 1.156             |       |
|                |                  | 0.01                                                        | 4.63                           | 4.3                              | 7.127             |       |
|                |                  | 0.1                                                         | 5.77                           | 5.9                              | 2.253             |       |
|                |                  | 1                                                           | 6.99                           | 6.8                              | 2.718             |       |
|                | 43.2             | 0.01                                                        | 4                              | 4.06                             | 1.500             |       |
|                |                  | 0.1                                                         | 5.36                           | 5.259                            | 1.884             |       |
|                |                  | 1                                                           | 6.42                           | 6.246                            | 2.710             |       |
|                |                  | 153.5                                                       | 0                              | 2.97                             | 3                 | 1.010 |
|                | 153.5            | 0.01                                                        | 3.82                           | 3.87                             | 1.309             |       |
|                |                  | 0.1                                                         | 5.23                           | 5.12                             | 2.103             |       |
|                |                  | 1                                                           | 6.29                           | 6.02                             | 4.293             |       |
|                |                  | 323                                                         | 10                             | 0.01                             | 4.85              | 4.9   |
| 0.1            | 5.9              |                                                             |                                | 5.95                             | 0.847             |       |
| 1              | 7.17             |                                                             |                                | 6.75                             | 5.858             |       |
| 43.2           | 0.01             |                                                             | 4.2                            | 3.2                              | 23.810            |       |
|                | 0.1              |                                                             | 5.49                           | 5.4                              | 1.639             |       |
|                | 1                |                                                             | 6.54                           | 6.29                             | 3.823             |       |
| 153.5          | 0.01             |                                                             | 3.99                           | 3.1                              | 22.306            |       |
|                | 0.1              |                                                             | 5.35                           | 5.1                              | 4.673             |       |
|                | 1                |                                                             | 6.43                           | 6.01                             | 6.532             |       |
| 353            | 10               |                                                             | 0.01                           | 5.16                             | 4.9               | 5.039 |
|                |                  |                                                             | 0.1                            | 6.29                             | 6                 | 4.610 |
|                |                  |                                                             | 1                              | 7.56                             | 6.851             | 9.378 |
|                | 43.2             | 0.01                                                        | 4.44                           | 4.2                              | 5.405             |       |
|                |                  | 0.1                                                         | 5.71                           | 5.59                             | 2.102             |       |
|                |                  | 1                                                           | 6.93                           | 6.42                             | 7.359             |       |

|       |      |      |      |       |
|-------|------|------|------|-------|
| 153.5 | 0.01 | 4.15 | 4.1  | 1.205 |
|       | 0.1  | 5.59 | 5.19 | 7.156 |
|       | 1    | 6.68 | 6.04 | 9.581 |

**Table 9:** Literature data and modeling results obtained with ePC-SAFT advanced for the system CO<sub>2</sub> + water + NaCl.

\*Literature data taken from Li et al.<sup>11</sup>

| $T / \text{K}$ | $p / \text{bar}$ | $\tilde{m}_{\text{salt}} / \text{mol}\cdot\text{kg}^{-1}$ | $\text{pH}^{\text{exp},*} / -$ | $\text{pH}^{\text{Modeled}} / -$ | $\text{ARD} / \%$ |
|----------------|------------------|-----------------------------------------------------------|--------------------------------|----------------------------------|-------------------|
| 343            | 10               | 1                                                         | 3.47                           | 3.52                             | 1.441             |
|                |                  | 3                                                         | 3.42                           | 3.418                            | 0.058             |
|                |                  | 5                                                         | 3.19                           | 3.329                            | 4.357             |

**Table 10:** Literature data and modeling results obtained with ePC-SAFT advanced for the system CO<sub>2</sub> + water + KCl.

\*Literature data taken from Mutailipu et al.<sup>14</sup>

| $T / \text{K}$ | $p / \text{bar}$ | $\tilde{m}_{\text{salt}} / \text{mol}\cdot\text{kg}^{-1}$ | $\text{pH}^{\text{exp},*} / -$ | $\text{pH}^{\text{Modeled}} / -$ | $\text{ARD} / \%$ |
|----------------|------------------|-----------------------------------------------------------|--------------------------------|----------------------------------|-------------------|
| 298            | 9                | 2                                                         | 3.34                           | 3.32                             | 0.599             |
|                |                  | 4                                                         | 3.19                           | 3.156                            | 1.066             |

**Table 11:** Literature data and modeling results of the partition coefficient for the system water + toluene + acetic acid.\*Literature data taken from Ziegenfuß and Maurer<sup>36</sup>.

| $x_{\text{Acetic acid}} / \text{mol} \cdot \text{mol}^{-1}$ | $K^{\text{aq./org.,exp.}^*} / \text{mol} \cdot \text{mol}^{-1}$ | $K^{\text{aq./org.,modeled}} / \text{mol} \cdot \text{mol}^{-1}$ | ARD / % |
|-------------------------------------------------------------|-----------------------------------------------------------------|------------------------------------------------------------------|---------|
| 0.003106633                                                 | 16.9139579                                                      | 18.479                                                           | 9.253   |
| 0.003088565                                                 | 11.21141981                                                     | 18.459                                                           | 64.645  |
| 0.006780777                                                 | 12.30590357                                                     | 16.825                                                           | 36.723  |
| 0.006780777                                                 | 14.77115275                                                     | 16.851                                                           | 14.080  |
| 0.009473803                                                 | 12.90087047                                                     | 15.746                                                           | 22.054  |
| 0.009420783                                                 | 9.329942433                                                     | 15.680                                                           | 68.061  |
| 0.012417212                                                 | 9.668512784                                                     | 14.497                                                           | 49.940  |
| 0.012399643                                                 | 9.654832803                                                     | 14.529                                                           | 50.484  |
| 0.018421514                                                 | 8.038361653                                                     | 12.351                                                           | 53.651  |
| 0.019619859                                                 | 8.236516514                                                     | 11.970                                                           | 45.328  |
| 0.019602546                                                 | 8.228494289                                                     | 11.981                                                           | 45.604  |
| 0.026717953                                                 | 6.951713624                                                     | 9.746                                                            | 40.196  |
| 0.026717953                                                 | 6.954258191                                                     | 9.746                                                            | 40.144  |
| 0.028282752                                                 | 5.626175628                                                     | 9.116                                                            | 62.028  |
| 0.028248737                                                 | 5.727134246                                                     | 9.141                                                            | 59.609  |
| 0.033326776                                                 | 5.981845935                                                     | 7.940                                                            | 32.735  |
| 0.033326776                                                 | 5.981299594                                                     | 7.940                                                            | 32.747  |
| 0.035906956                                                 | 4.983763621                                                     | 7.190                                                            | 44.268  |
| 0.036157358                                                 | 5.019433957                                                     | 7.128                                                            | 42.008  |



**Table 12:** Literature data and modeling results obtained with ePC-SAFT advanced for the pH of the system water + toluene + acetic acid. \*Literature data taken from Ziegenfuß and Maurer<sup>36</sup>.

| $x_{\text{Acetic acid}} / \text{mol} \cdot \text{mol}^{-1}$ | $\text{pH}^{\text{exp},*} / -$ | $\text{pH}^{\text{Modeled}} / -$ | <b>ARD / %</b> |
|-------------------------------------------------------------|--------------------------------|----------------------------------|----------------|
| 0.003106633                                                 | 2.48                           | 2.752                            | 10.968         |
| 0.003088565                                                 | 2.48                           | 2.747                            | 10.766         |
| 0.006780777                                                 | 2.54                           | 2.566                            | 1.0240         |
| 0.006780777                                                 | 2.54                           | 2.569                            | 1.1420         |
| 0.009473803                                                 | 2.54                           | 2.487                            | 2.0870         |
| 0.009420783                                                 | 2.21                           | 2.482                            | 12.308         |
| 0.012417212                                                 | 2.2                            | 2.414                            | 9.7270         |
| 0.012399643                                                 | 2.4                            | 2.415                            | 0.6250         |
| 0.018421514                                                 | 2.03                           | 2.307                            | 13.645         |
| 0.019619859                                                 | 2.31                           | 2.291                            | 0.8230         |
| 0.019602546                                                 | 2.32                           | 2.292                            | 1.2070         |
| 0.026717953                                                 | 2.25                           | 2.201                            | 2.1780         |
| 0.026717953                                                 | 2.24                           | 2.201                            | 1.7410         |
| 0.028282752                                                 | 1.91                           | 2.177                            | 13.979         |
| 0.028248737                                                 | 1.9                            | 2.178                            | 14.632         |
| 0.033326776                                                 | 2.18                           | 2.133                            | 2.1560         |
| 0.033326776                                                 | 2.2                            | 2.133                            | 3.0450         |
| 0.035906956                                                 | 1.84                           | 2.103                            | 14.293         |
| 0.036157358                                                 | 1.83                           | 2.101                            | 14.809         |

**Table 13:** Literature data and modeling results of the partition coefficient for the system water + MIBK + oxalic acid.\*Literature data taken from Kirsch and Maurer<sup>37</sup>.

| $x_{\text{Oxalic acid}} / \text{mol}\cdot\text{mol}^{-1}$ | $K^{\text{aq./org.,exp.,*}} / \text{mol}\cdot\text{mol}^{-1}$ | $K^{\text{aq./org., modeled}} / \text{mol}\cdot\text{mol}^{-1}$ | ARD / % |
|-----------------------------------------------------------|---------------------------------------------------------------|-----------------------------------------------------------------|---------|
| 0.002686761                                               | 1.522081229                                                   | 1.478                                                           | 2.896   |
| 0.002668897                                               | 1.50159018                                                    | 1.486                                                           | 1.038   |
| 0.003595687                                               | 1.168937551                                                   | 1.328                                                           | 13.607  |
| 0.003595044                                               | 1.160909375                                                   | 1.326                                                           | 14.221  |
| 0.005464745                                               | 1.313488364                                                   | 1.217                                                           | 7.346   |
| 0.005359124                                               | 1.286502542                                                   | 1.219                                                           | 5.247   |
| 0.005576278                                               | 1.225554585                                                   | 1.202                                                           | 1.922   |
| 0.007452668                                               | 1.184448329                                                   | 1.133                                                           | 4.344   |
| 0.008138001                                               | 1.215313327                                                   | 1.117                                                           | 8.090   |
| 0.00813945                                                | 1.218199973                                                   | 1.117                                                           | 8.307   |
| 0.009087627                                               | 1.031242963                                                   | 1.084                                                           | 5.116   |
| 0.009318322                                               | 1.045776464                                                   | 1.080                                                           | 3.273   |
| 0.010534301                                               | 1.18328626                                                    | 1.070                                                           | 9.574   |
| 0.010551878                                               | 1.185260628                                                   | 1.070                                                           | 9.724   |
| 0.01124288                                                | 1.130956715                                                   | 1.057                                                           | 6.539   |
| 0.012569073                                               | 1.16345273                                                    | 1.047                                                           | 10.009  |
| 0.012569073                                               | 1.069677025                                                   | 1.042                                                           | 2.587   |
| 0.015019026                                               | 1.094300104                                                   | 1.025                                                           | 6.333   |
| 0.019539055                                               | 1.032051619                                                   | 1.014                                                           | 1.749   |

**Table 14:** Literature data and modeling results obtained with ePC-SAFT advanced for the pH of the system water + MIBK + oxalic acid. \*Literature data taken from Kirsch and Maurer<sup>37</sup>.

| $x_{\text{Oxalic acid}} / \text{mol} \cdot \text{mol}^{-1}$ | $\text{pH}^{\text{exp},*} / -$ | $\text{pH}^{\text{Modeled}} / -$ | <b>ARD / %</b> |
|-------------------------------------------------------------|--------------------------------|----------------------------------|----------------|
| 0.003106633                                                 | 1.24                           | 1.185                            | 4.435          |
| 0.003088565                                                 | 1.25                           | 1.186                            | 5.120          |
| 0.006780777                                                 | 1.1                            | 1.086                            | 1.273          |
| 0.006780777                                                 | 1.12                           | 1.085                            | 3.125          |
| 0.009473803                                                 | 1.09                           | 0.998                            | 8.440          |
| 0.009420783                                                 | 1.1                            | 1.001                            | 9.000          |
| 0.012417212                                                 | 0.88                           | 0.986                            | 12.045         |
| 0.012399643                                                 | 0.8                            | 0.913                            | 14.125         |
| 0.018421514                                                 | 1                              | 0.895                            | 10.500         |
| 0.019619859                                                 | 1.01                           | 0.896                            | 11.287         |
| 0.019602546                                                 | 0.86                           | 0.851                            | 1.047          |
| 0.026717953                                                 | 0.88                           | 0.847                            | 3.750          |
| 0.026717953                                                 | 0.95                           | 0.832                            | 12.421         |
| 0.028282752                                                 | 0.96                           | 0.831                            | 13.438         |
| 0.028248737                                                 | 0.71                           | 0.811                            | 14.225         |
| 0.033326776                                                 | 0.92                           | 0.788                            | 14.348         |
| 0.033326776                                                 | 0.94                           | 0.778                            | 17.234         |
| 0.035906956                                                 | 0.63                           | 0.738                            | 17.143         |
| 0.036157358                                                 | 0.6                            | 0.667                            | 11.167         |

**Table 15:** Literature data and modeling results of the partition coefficient for the system water + MIBK + citric acid.\*Literature data taken from Kirsch et al.<sup>17</sup>.

| $x_{\text{Citric acid}} / \text{mol}\cdot\text{mol}^{-1}$ | $K^{\text{aq./org.,exp.,*}} / \text{mol}\cdot\text{mol}^{-1}$ | $K^{\text{aq./org.,modeled}} / \text{mol}\cdot\text{mol}^{-1}$ | ARD / %  |
|-----------------------------------------------------------|---------------------------------------------------------------|----------------------------------------------------------------|----------|
| 0.010741368                                               | 14.80704267                                                   | 14.329                                                         | 3.228482 |
| 0.010758931                                               | 14.65979502                                                   | 12.902                                                         | 11.99058 |
| 0.021505643                                               | 13.21644263                                                   | 11.796                                                         | 10.74754 |
| 0.022612022                                               | 14.04712291                                                   | 10.778                                                         | 23.27254 |
| 0.022612022                                               | 13.68030479                                                   | 10.008                                                         | 26.84374 |
| 0.03610963                                                | 12.95023473                                                   | 9.313                                                          | 28.08625 |
| 0.03626987                                                | 12.80374946                                                   | 8.810                                                          | 31.19203 |
| 0.051300085                                               | 11.40020258                                                   | 8.508                                                          | 25.36975 |
| 0.051300085                                               | 11.55690944                                                   | 8.506                                                          | 26.39901 |

**Table 16:** Literature data and modeling results obtained with ePC-SAFT advanced for the pH of the system water + MIBK + citric acid. \*Literature data taken from Kirsch et al.<sup>17</sup>.

| $x_{\text{Citric acid}} / \text{mol}\cdot\text{mol}^{-1}$ | $\text{pH}^{\text{exp.,*}} / -$ | $\text{pH}^{\text{Modeled}} / -$ | ARD / % |
|-----------------------------------------------------------|---------------------------------|----------------------------------|---------|
| 0.010741368                                               | 1.28                            | 1.568                            | 22.500  |
| 0.010758931                                               | 1.29                            | 1.493                            | 15.736  |
| 0.021505643                                               | 0.97                            | 1.429                            | 47.320  |
| 0.022612022                                               | 1.04                            | 1.373                            | 32.019  |
| 0.022612022                                               | 1.04                            | 1.323                            | 27.212  |
| 0.03610963                                                | 0.86                            | 1.277                            | 48.488  |
| 0.03626987                                                | 0.85                            | 1.236                            | 45.412  |
| 0.051300085                                               | 0.67                            | 1.198                            | 78.806  |

# References

- 1 M. L. Michelsen, The isothermal flash problem. Part I. Stability, *Fluid Phase Equilibria*, 1982, **9**, 1–19.
- 2 M. L. Michelsen, The isothermal flash problem. Part II. Phase-split calculation, *Fluid Phase Equilibria*, 1982, **9**, 21–40.
- 3 W. G. Chapman, K. E. Gubbins, G. Jackson and M. Radosz, SAFT: Equation-of-state solution model for associating fluids, *Fluid Phase Equilibria*, 1989, **52**, 31–38.
- 4 J. Gross and G. Sadowski, Perturbed-Chain SAFT: An Equation of State Based on a Perturbation Theory for Chain Molecules, *Ind. Eng. Chem. Res.*, 2001, **40**, 1244–1260.
- 5 L. F. Cameretti, G. Sadowski and J. M. Mollerup, Modeling of Aqueous Electrolyte Solutions with Perturbed-Chain Statistical Associated Fluid Theory, *Ind. Eng. Chem. Res.*, 2005, **44**, 3355–3362.
- 6 M. Bülow, X. Ji and C. Held, Incorporating a concentration-dependent dielectric constant into ePC-SAFT. An application to binary mixtures containing ionic liquids, *Fluid Phase Equilibria*, 2019, **492**, 26–33.
- 7 M. Bülow, M. Ascani and C. Held, ePC-SAFT advanced - Part I: Physical meaning of including a concentration-dependent dielectric constant in the born term and in the Debye-Hückel theory, *Fluid Phase Equilibria*, 2021, **535**, 112967.
- 8 E. Huckel and P. Debye, Zur theorie der elektrolyte. i. gefrierpunktserniedrigung und verwandte erscheinungen, *Phys. Z*, 1923, **24**, 185–206.
- 9 S. Beret and J. M. Prausnitz, Perturbed hard-chain theory: An equation of state for fluids containing small or large molecules, *AIChE J.*, 1975, **21**, 1123–1132.
- 10 L. F. Cameretti and G. Sadowski, Modeling of aqueous amino acid and polypeptide solutions with PC-SAFT, *Chemical Engineering and Processing: Process Intensification*, 2008, **47**, 1018–1025.
- 11 X. Li, C. Peng, J. P. Crawshaw, G. C. Maitland and J. M. Trusler, The pH of CO<sub>2</sub>-saturated aqueous NaCl and NaHCO<sub>3</sub> solutions at temperatures between 308 K and 373 K at pressures up to 15 MPa, *Fluid Phase Equilibria*, 2018, **458**, 253–263.
- 12 W. Yan, S. Huang and E. H. Stenby, Measurement and modeling of CO<sub>2</sub> solubility in NaCl brine and CO<sub>2</sub>-saturated NaCl brine density, *International Journal of Greenhouse Gas Control*, 2011, **5**, 1460–1477.
- 13 Y. Liu, M. Hou, G. Yang and B. Han, Solubility of CO<sub>2</sub> in aqueous solutions of NaCl, KCl, CaCl<sub>2</sub> and their mixed salts at different temperatures and pressures, *The Journal of Supercritical Fluids*, 2011, **56**, 125–129.
- 14 M. Mutailipu, Y. Liu, Y. Song and J. M. Trusler, The pH of CO<sub>2</sub>-saturated aqueous KCl solutions at temperatures between 298 K and 423 K at pressures up to 13.5 MPa, *Chemical Engineering Science*, 2021, **234**, 116434.
- 15 H. Zhao, R. M. Dilmore and S. N. Lvov, Experimental studies and modeling of CO<sub>2</sub> solubility in high temperature aqueous CaCl<sub>2</sub> MgCl<sub>2</sub> Na<sub>2</sub>SO<sub>4</sub> and KCl solutions, *AIChE J.*, 2015, **61**, 2286–2297.
- 16 S. He and J. W. Morse, The carbonic acid system and calcite solubility in aqueous Na-K-Ca-Mg-Cl-SO<sub>4</sub> solutions from 0 to 90°C, *Geochimica et Cosmochimica Acta*, 1993, **57**, 3533–3554.
- 17 T. Kirsch, H. Ziegenfuß and G. Maurer, Distribution of citric, acetic and oxalic acids between water and organic solutions of tri-n-octylamine, *Fluid Phase Equilibria*, 1997, **129**, 235–266.

- 18 D. Fuchs, J. Fischer, F. Tumakaka and G. Sadowski, Solubility of Amino Acids: Influence of the pH value and the Addition of Alcoholic Cosolvents on Aqueous Solubility, *Ind. Eng. Chem. Res.*, 2006, **45**, 6578–6584.
- 19 D. Pabsch, C. Held and G. Sadowski, Modeling the CO<sub>2</sub> Solubility in Aqueous Electrolyte Solutions Using ePC-SAFT, *J. Chem. Eng. Data*, 2020, **65**, 5768–5777.
- 20 A. Tihic, G. M. Kontogeorgis, N. von Solms and M. L. Michelsen, Applications of the simplified perturbed-chain SAFT equation of state using an extended parameter table, *Fluid Phase Equilibria*, 2006, **248**, 29–43.
- 21 J. Gross and G. Sadowski, Application of the Perturbed-Chain SAFT Equation of State to Associating Systems, *Ind. Eng. Chem. Res.*, 2002, **41**, 5510–5515.
- 22 L. Lange, M. Schleinitz and G. Sadowski, Predicting the Effect of pH on Stability and Solubility of Polymorphs, Hydrates, and Cocrystals, *Crystal Growth & Design*, 2016, **16**, 4136–4147.
- 23 E. A. Crespo, L. P. Silva, M. A. R. Martins, M. Bülow, O. Ferreira, G. Sadowski, C. Held, S. P. Pinho and J. A. P. Coutinho, The role of polyfunctionality in the formation of [ch] cl-carboxylic acid-based deep eutectic solvents, *Ind. Eng. Chem. Res.*, 2018, **57**, 11195–11209.
- 24 C. Held, T. Reschke, S. Mohammad, A. Luza and G. Sadowski, ePC-SAFT revised, *Chemical Engineering Research and Design*, 2014, **92**, 2884–2897.
- 25 D. Pabsch, P. Figiel, G. Sadowski and C. Held, Solubility of electrolytes in organic solvents: Solvent-specific effects and ion-specific effects., *Chem. Eng. Data*, 2022.
- 26 S. Mohammad, C. Held, E. Altuntepe, T. Köse, T. Gerlach, I. Smirnova and G. Sadowski, Salt influence on MIBK/water liquid–liquid equilibrium: Measuring and modeling with ePC-SAFT and COSMO-RS, *Fluid Phase Equilibria*, 2016, **416**, 83–93.
- 27 A. Roda, F. Santos, Y. Z. Chua, A. Kumar, H. T. Do, A. Paiva, A. R. C. Duarte and C. Held, Unravelling the nature of citric acid:L-arginine:water mixtures: the bifunctional role of water, *Physical chemistry chemical physics : PCCP*, 2021, **23**, 1706–1717.
- 28 W. M. Haynes, D. R. Lide and T. J. Bruno, *CRC Handbook of Chemistry and Physics*, CRC Press, 2016.
- 29 F. O. Farias, H. Passos, J. A. P. Coutinho and M. R. Mafra, pH Effect on the Formation of Deep-Eutectic-Solvent-Based Aqueous Two-Phase Systems, *Ind. Eng. Chem. Res.*, 2018, **57**, 16917–16924.
- 30 D. Li and Z. Duan, The speciation equilibrium coupling with phase equilibrium in the H<sub>2</sub>O–CO<sub>2</sub>–NaCl system from 0 to 250 C, from 0 to 1000 bar, and from 0 to 5 molality of NaCl, *Chemical Geology*, 2007, **244**, 730–751.
- 31 J. Li and Z. Duan, A thermodynamic model for the prediction of phase equilibria and speciation in the H<sub>2</sub>O–CO<sub>2</sub>–NaCl–CaCO<sub>3</sub>–CaSO<sub>4</sub> system from 0 to 250 C, 1 to 1000 bar with NaCl concentrations up to halite saturation, *Geochimica et Cosmochimica Acta*, 2011, **75**, 4351–4376.
- 32 W. B. Floriano and M. A. C. Nascimento, Dielectric constant and density of water as a function of pressure at constant temperature, *Braz. J. Phys.*, 2004, **34**, 38–41.
- 33 C. Andeen, J. Fontanella and D. Schuele, Low-Frequency Dielectric Constant of LiF, NaF, NaCl, NaBr, KCl, and KBr by the Method of Substitution, *Physical Review B*, 1970, 5068–5073.
- 34 C. Peng, J. P. Crawshaw, G. C. Maitland, J. P. Martin Trusler and D. Vega-Maza, The pH of CO<sub>2</sub>-saturated water at temperatures between 308K and 423K at pressures up to 15MPa, *The Journal of Supercritical Fluids*, 2013, **82**, 129–137.

- 35 X. Han, Z. Yu, J. Qu, T. Qi, W. Guo and G. Zhang, Measurement and Correlation of Solubility Data for CO<sub>2</sub> in NaHCO<sub>3</sub> Aqueous Solution, *J. Chem. Eng. Data*, 2011, **56**, 1213–1219.
- 36 H. Ziegenfuß and G. Maurer, Distribution of acetic acid between water and organic solutions of tri-n-octylamine, *Fluid Phase Equilibria*, 1994, **102**, 211–255.
- 37 T. Kirsch and G. Maurer, Distribution of Oxalic Acid between Water and Organic Solutions of Tri- n -octylamine, *Ind. Eng. Chem. Res.*, 1996, **35**, 1722–1735.
